# Supplementary material
Source: publisher figshare collection journal article supplement (https://acs.figshare.com/ndownloader/files/13165157)
Supplement: Supplementary file 1 [file 13165157]

Supporting Information

## **Atomic and Molecular Adsorption on the Bi(111) Surface: Insights into Catalytic CO<sub>2</sub> Reduction**

Wooseok Oh <sup>1</sup>, Choong Kyun Rhee <sup>1</sup>, Jeong Woo Han <sup>2</sup>, Bonggeun Shong <sup>3\*</sup>

<sup>1</sup> Department of Chemistry, Chungnam National University, Daejeon 34134, South Korea

<sup>2</sup> Department of Chemical Engineering, Pohang University of Science and Technology (POSTECH),  
Pohang 37673, South Korea

<sup>3</sup> Department of Chemical Engineering, Hongik University, Seoul 04066, South Korea

\* Corresponding author, e-mail: bshong@hongik.ac.kr

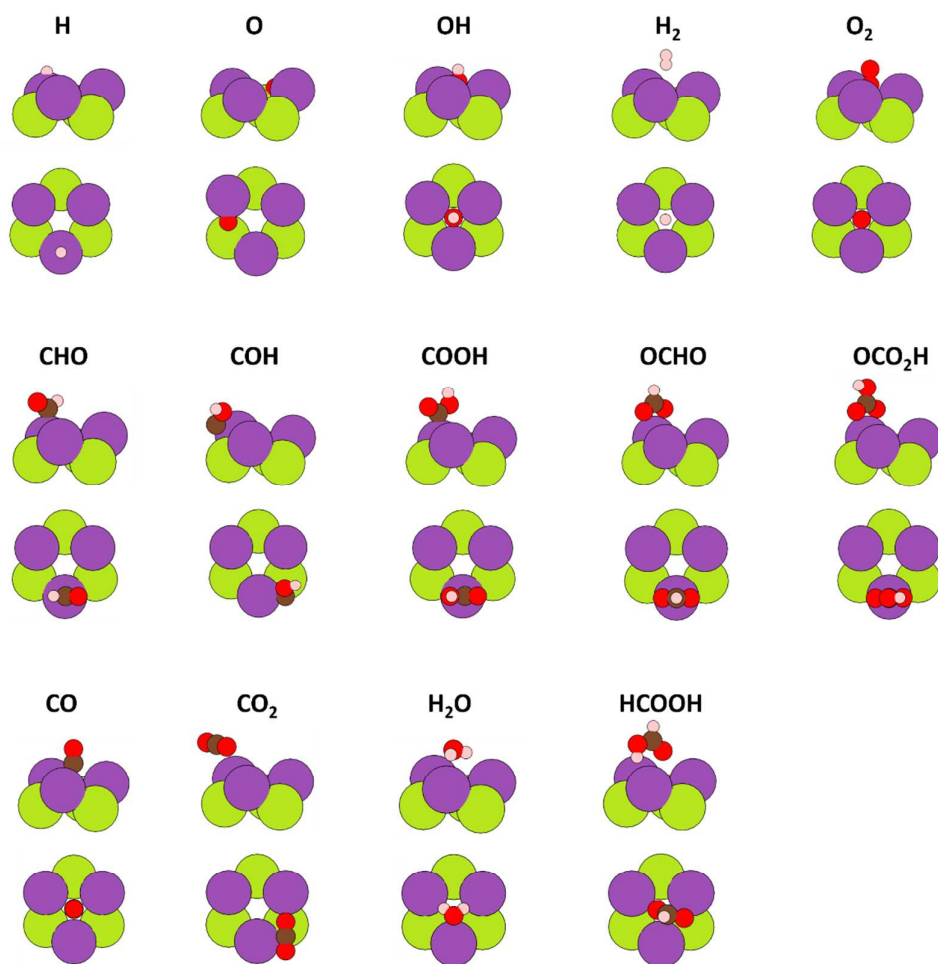

**Figure S1.** Geometry of the adsorbates: side view and top view.

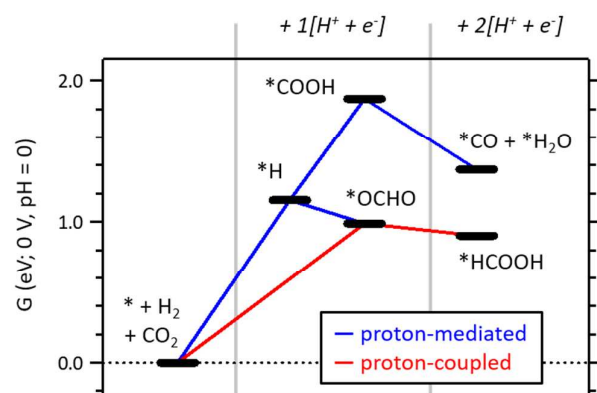

**Figure S2.** Free energy profiles for CO<sub>2</sub> reduction reaction on the Bi(111) surface (0 V vs. CHE, pH = 0).
